# Supplementary material for: Peptide Deformylase (def) is essential in Mycobacterium smegmatis, but the essentiality is compensated by inactivation of methionine formylation
Source: PubMed Central journal article supplement (PMC6815462; doi:10.1186/s12866-019-1611-7), 2019-10-26
Supplement: 12866_2019_1611_MOESM1_ESM.pdf [file 12866_2019_1611_MOESM1_ESM.pdf]

Supplementary Table 1:

Primers (oligonucleotides) used in this study:

| Oligo nucleotide name | Sequence 5'=>3'                               |
|-----------------------|-----------------------------------------------|
| defsmko1              | AGTCTAGAATCCGAGGAGTCGTCGTCGGAACCCA            |
| Defsmko2              | TGTGCAGTACTGGGTCTCCGACAATG                    |
| Defsmko3              | CAAGAAGGCCGTCAAACGCAACGGC                     |
| Defsmko4              | ATGCGGCCGCCACGAACTGCGCATCGATGTTCCGGC          |
| Defsmko5              | GCATTGTCGGAGACCCAGTACTGCACACAAGAAGGCCGTCAAACG |
| defKOchqD             | GACCTCGACCGGCACCTTGCGTTTCG                    |
| defKOchqU             | CTCGGACGTCTTGGTGGGTGTGGTC                     |
| defSmU                | TCAGATCAGAGTCGTCACCGGATTG                     |
| defSmD                | AGCTCAGACATCAGGCACCTCGGC                      |
| fmt smg_R_xbal        | TCTAGAGCGGACGTTTGC GCGGCGGG                   |
| fmt smg_BamHI         | GGATCCGCTGTCGCTCGGCTCGTCCT                    |
